# Supplementary material for: Ni/NiO/Ni–B/graphene heterostructure-modified electrodes and their electrochemical activities towards acetaminophen
Source: Royal Society of Chemistry journal article supplement (doi:10.1039/d1ay00446h), 2021-01-01
Supplement: d1ay00446h1.pdf [file d1ay00446h1.pdf]

# Ni/NiO/Ni-B/Graphene Heterostructure-Modified Electrodes and Their Electrochemical Activities Towards Acetaminophen

Hasan Huseyin IPEKCI<sup>1,2,\*</sup>, Merve OZCAN<sup>1</sup>, Busra Gizem TURKYILMAZ<sup>1</sup>, Aytekin  
UZUNOGLU<sup>1,3</sup>

<sup>1</sup> Metallurgical and Materials Engineering, Faculty of Engineering and Architecture,  
Necmettin Erbakan University, Konya, TURKEY

<sup>2</sup> Science and Technology Application and Research Center (BITAM), Necmettin Erbakan  
University, Konya, TURKEY

<sup>3</sup> Biotechnology Research Group, Science and Technology Application and Research Center  
(BITAM), Necmettin Erbakan University, Konya, TURKEY

\* Corresponding author: [hhipekci@erbakan.edu.tr](mailto:hhipekci@erbakan.edu.tr), [hsnpkc@gmail.com](mailto:hsnpkc@gmail.com)

## S1. TGA profile of Ni/NiO/GNPs

The amount of Ni and Ni-based species anchored on graphene surface was determined using TGA analysis by exposing the sample to oxygen-rich atmosphere with increasing temperature (Figure S1). The weight percent of the Ni-species was found to be 42.1.

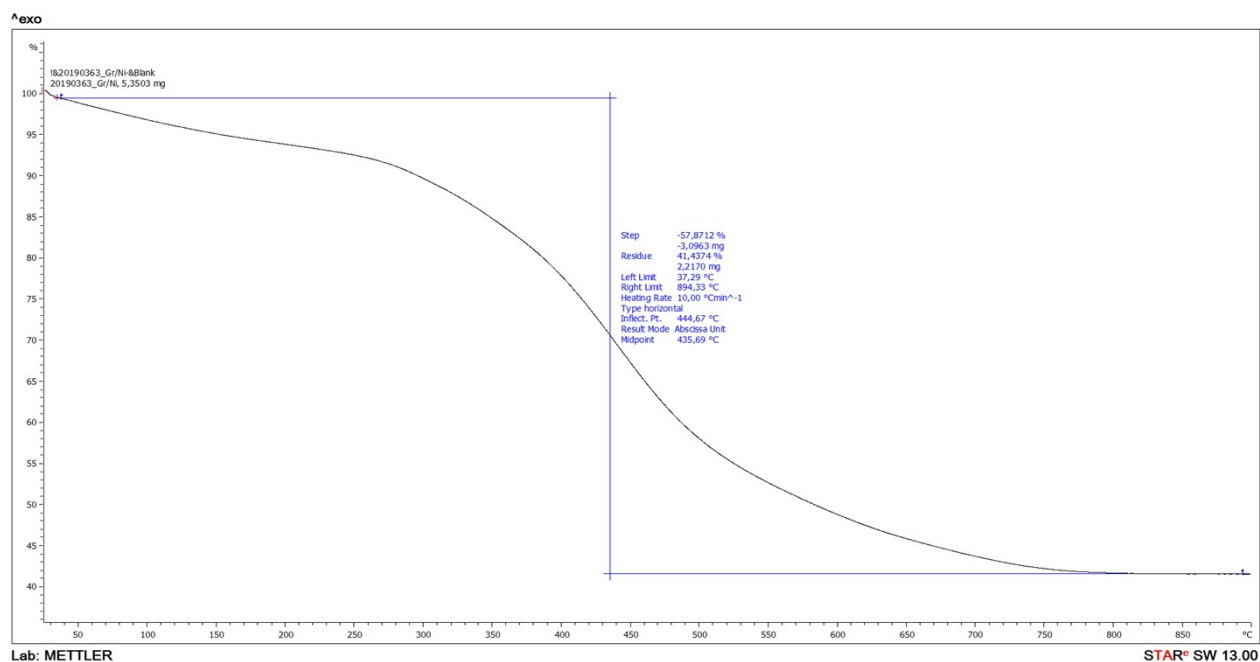

Figure S1. TGA profile of Ni/NiO/GNPs.

**S2. CV results obtained in 10 mM PBS: (a) GCE, (b) Graphene/GCE, (c) Ni/NiO/Ni-B/Gr-GCE.**

Fig. S2 displays electrochemical behavior of bare, graphene and Ni/NiO/Ni-B/Gr-modified GC electrodes absence and presence of APAP. The highest current response was seen at Ni/NiO/Ni-B/Gr-modified GC electrode. The increase in current at Ni/NiO/Ni-B/Gr-modified GC electrode is 31.25% greater than the Graphene-GCE in the presence of 200  $\mu\text{M}$  APAP.

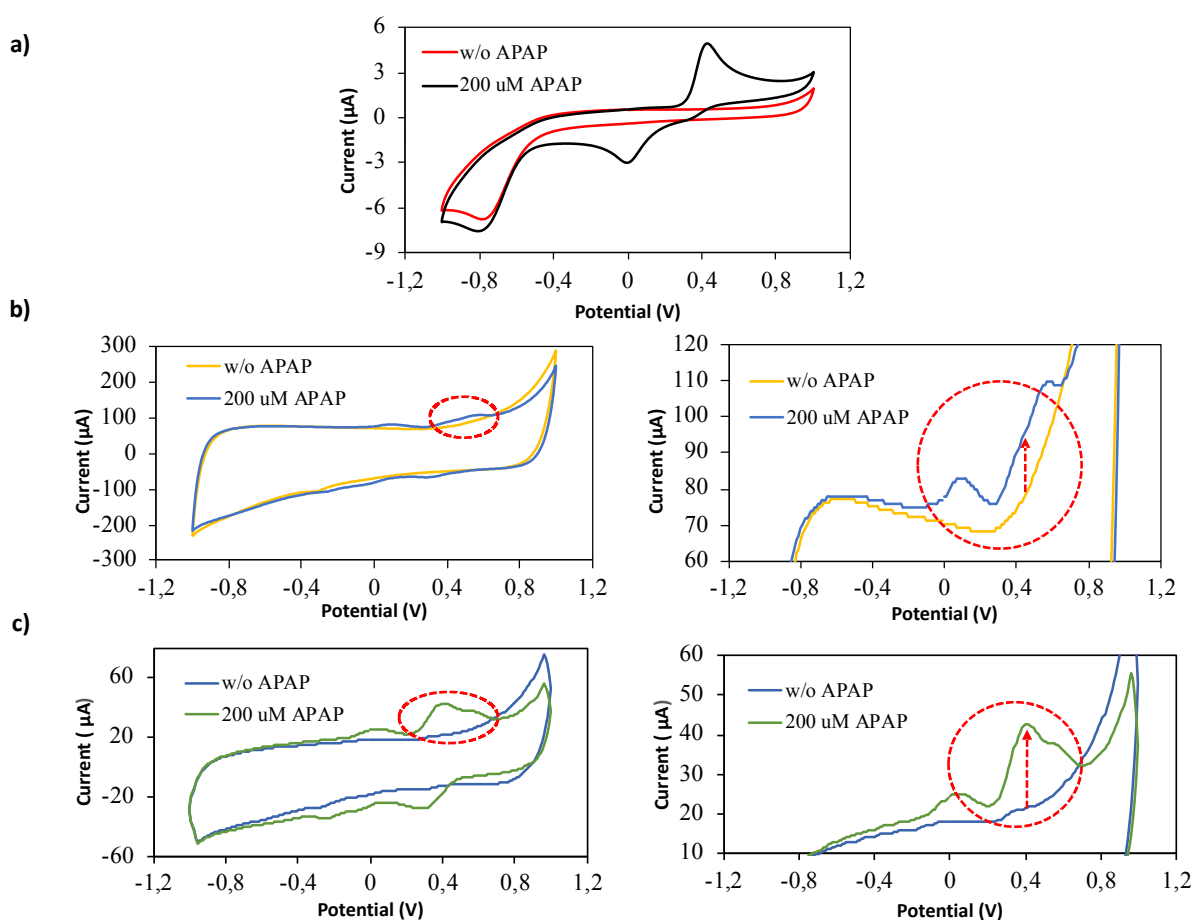

**Figure S2.** CV results obtained in 0.01 M PBS: (a) GCE, (b) Graphene/GCE, (c) Ni/NiO/Ni-B/Gr-GCE
